# Supplementary material for: Physical insights into the facilitation of an unprecedented complexation reaction on the surface of a doped quantum dot leading to white light generation
Source: Royal Society of Chemistry journal article supplement (doi:10.1039/d1cp00753j), 2021-01-01
Supplement: d1cp00753j1.pdf [file d1cp00753j1.pdf]

## Electronic Supplementary Information

### Physical Insights into Facilitation of an Unprecedented Complexation Reaction on the Surface of a Doped Quantum Dot Leading to White Light Generation

Sabyasachi Pramanik,<sup>a,\*</sup> Mihir Manna,<sup>b</sup> Biswajit Hudait,<sup>b</sup> Shilaj Roy,<sup>b,\*</sup> Satyapriya Bhandari<sup>c,\*</sup>

<sup>a</sup> Assam Energy Institute Sivasagar, , Centre of Rajiv Gandhi Institute of Petroleum Technology, Assam-785697, India.

<sup>b</sup>Department of Chemistry, Indian Institute of Technology Guwahati, Guwahati, Assam-781039, India.

<sup>c</sup>Department of Chemistry, University of North Bengal, Raja Rammohunpur, Darjeeling, West Bengal – 734013, India.

\*Email – [satyapriya@nbu.ac.in](mailto:satyapriya@nbu.ac.in); [roy.shilaj@gmail.com](mailto:roy.shilaj@gmail.com); [spramanik@rgipt.ac.in](mailto:spramanik@rgipt.ac.in)

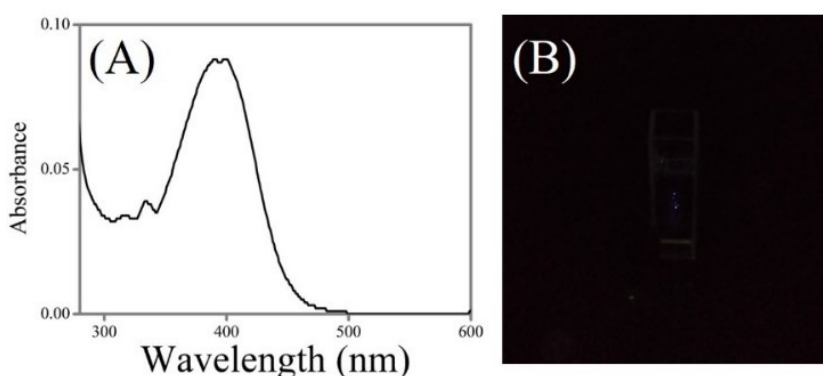

**Fig. S1.** (A) UV-vis (B) digital photograph (captured under 320 nm light from a spectrofluorimeter) of CuQ<sub>2</sub>.

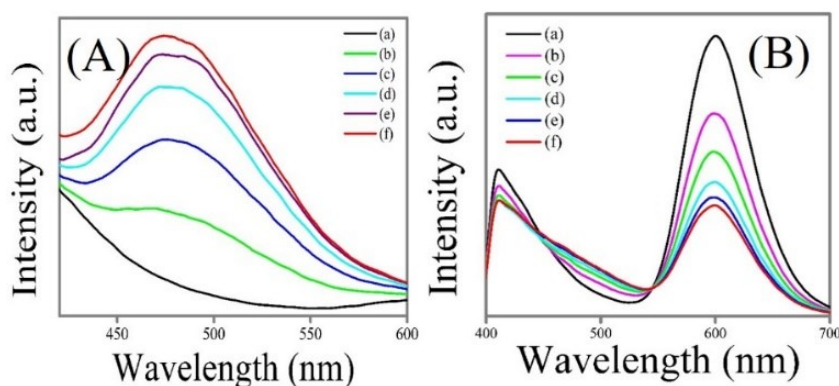

**Fig. S2.** Emission spectra of different amount (a) 0.0, (b) 2.0, (c) 4.0, (d) 6.0, (e) 8.0, and (f) 10.0 μL of 0.1 mM CuQ<sub>2</sub> treated Mn<sup>2+</sup>-doped ZnS QDs at an excitation wavelength of (A) 365 nm and (B) 320 nm.

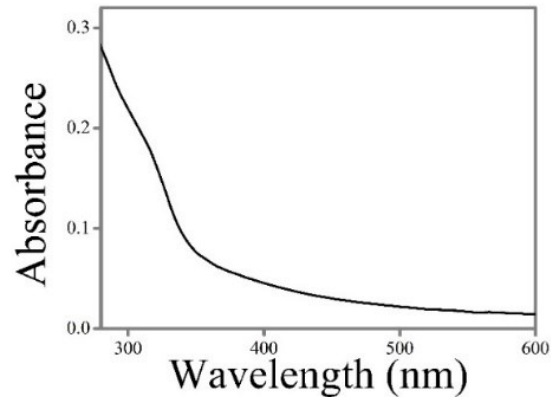

**Fig. S3.** UV-vis spectrum of CuQ<sub>2</sub> treated Mn<sup>2+</sup>-doped ZnS QDs (QDC).

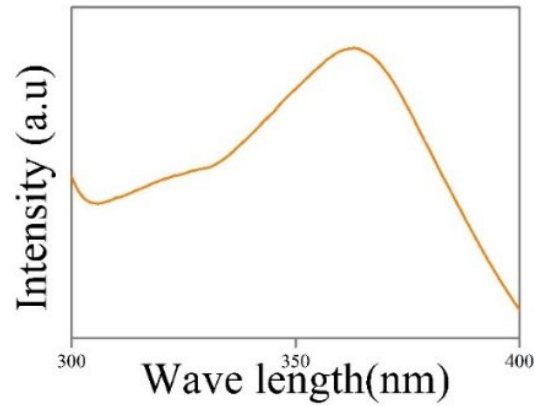

**Fig. S4.** Excitation spectrum (at  $\lambda_{em}$ -598 nm) of CuQ<sub>2</sub> treated Mn<sup>2+</sup>-doped ZnS QDs (QDC).

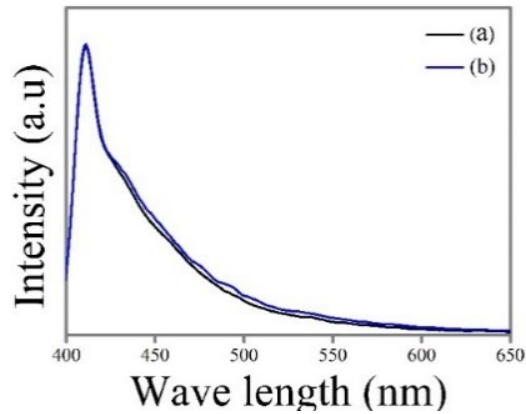

**Fig. S5.** Emission spectra ( $\lambda_{ex}$ =365 nm) of CuQ<sub>2</sub> (a) before and (b) after addition of Zn<sup>2+</sup> ions.

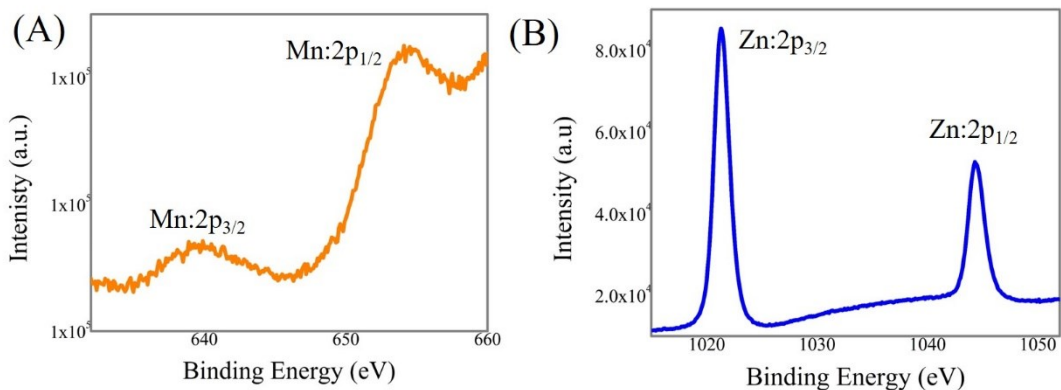

**Fig. S6.** X-ray photoelectron spectra (A) Mn-2p and (B) Zn-2p of CuQ<sub>2</sub> treated Mn<sup>2+</sup>-doped ZnS QDs (QDC).

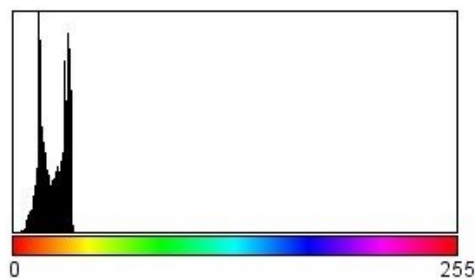

**Fig. S7.** Hue histogram of orange light emitting Mn<sup>2+</sup>-doped ZnS QDs. The hue value calculated by analysing Fig. 1F (manuscript) using Image-J software.

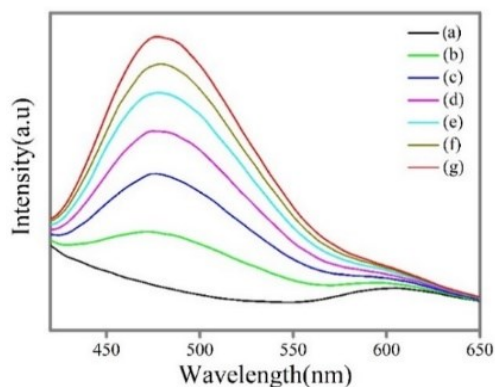

**Fig. S8.** Emission spectra ( $\lambda_{\text{ex}} = 365 \text{ nm}$ ) of different amounts (a) 0.0, (b) 2.0, (c) 4.0, (d) 6.0, (e) 8.0, (f) 10.0, and (g) 12.0  $\mu$ L of 0.1 mM HQ added Mn<sup>2+</sup> doped ZnS QDs.

**Table S1.** Chromaticities, CRI and CCT values of white light emitting CuQ<sub>2</sub> treated Mn<sup>2+</sup>-doped ZnS QDs (QDC) at different excitation wavelengths in the range of 320-365 nm (with respect to Fig. 2A-2B-2C).

| $\lambda_{\text{ex}}$ (nm) | CIE (x,y)  | CRI | CCT (K) |
|----------------------------|------------|-----|---------|
| 320                        | 0.53, 0.43 | 35  | 2019    |
| 325                        | 0.52, 0.42 | 36  | 2060    |
| 330                        | 0.51, 0.42 | 40  | 2136    |
| 335                        | 0.50, 0.42 | 47  | 2284    |
| 340                        | 0.47, 0.42 | 57  | 2618    |
| 345                        | 0.43, 0.42 | 68  | 3252    |
| 350                        | 0.38, 0.42 | 73  | 4191    |
| 355                        | 0.34, 0.42 | 71  | 5146    |
| 360                        | 0.32, 0.43 | 67  | 5854    |
| 365                        | 0.30, 0.42 | 64  | 6322    |

**Table S2.** Chromaticities, CRI and CCT values of white light emitting CuQ<sub>2</sub> treated Mn<sup>2+</sup>-doped ZnS QDs (QDC) at different time interval and at an excitation wavelength of 355 nm (with respect to Fig. 2G-2H).

| Time          | CIE (x,y)  | CRI | CCT (K) |
|---------------|------------|-----|---------|
| 0 sec         | 0.45, 0.44 | 36  | 3020    |
| 15 sec        | 0.44, 0.38 | 65  | 2638    |
| 59 sec        | 0.43, 0.38 | 71  | 2973    |
| 1 min 43 sec  | 0.42, 0.38 | 72  | 3025    |
| 2 min 27 sec  | 0.41, 0.38 | 75  | 3257    |
| 3 min 12 sec  | 0.40, 0.38 | 78  | 3539    |
| 3 min 57 sec  | 0.39, 0.39 | 80  | 3877    |
| 4 min 42 sec  | 0.38, 0.39 | 80  | 4140    |
| 5 min 26 sec  | 0.37, 0.40 | 80  | 4405    |
| 6 min 12 sec  | 0.36, 0.40 | 79  | 4609    |
| 6 min 56 sec  | 0.35, 0.40 | 78  | 4753    |
| 7 min 41 sec  | 0.35, 0.41 | 77  | 4860    |
| 8 min 25 sec  | 0.35, 0.41 | 76  | 4930    |
| 9 min 10 sec  | 0.35, 0.41 | 76  | 4998    |
| 9 min 55 sec  | 0.34, 0.41 | 76  | 5045    |
| 10 min 39 sec | 0.34, 0.41 | 75  | 5069    |
| 11 min 24 sec | 0.34, 0.41 | 75  | 5088    |
| 12 min        | 0.34, 0.41 | 75  | 5087    |
| 12 min 54 sec | 0.34, 0.42 | 75  | 5090    |
